# Supplementary material
Source: publisher figshare collection journal article supplement (https://sage.figshare.com/ndownloader/files/24101899)
Supplement: Supplementary file 1 [file 24101899]

## ACE Score Distribution in Participants

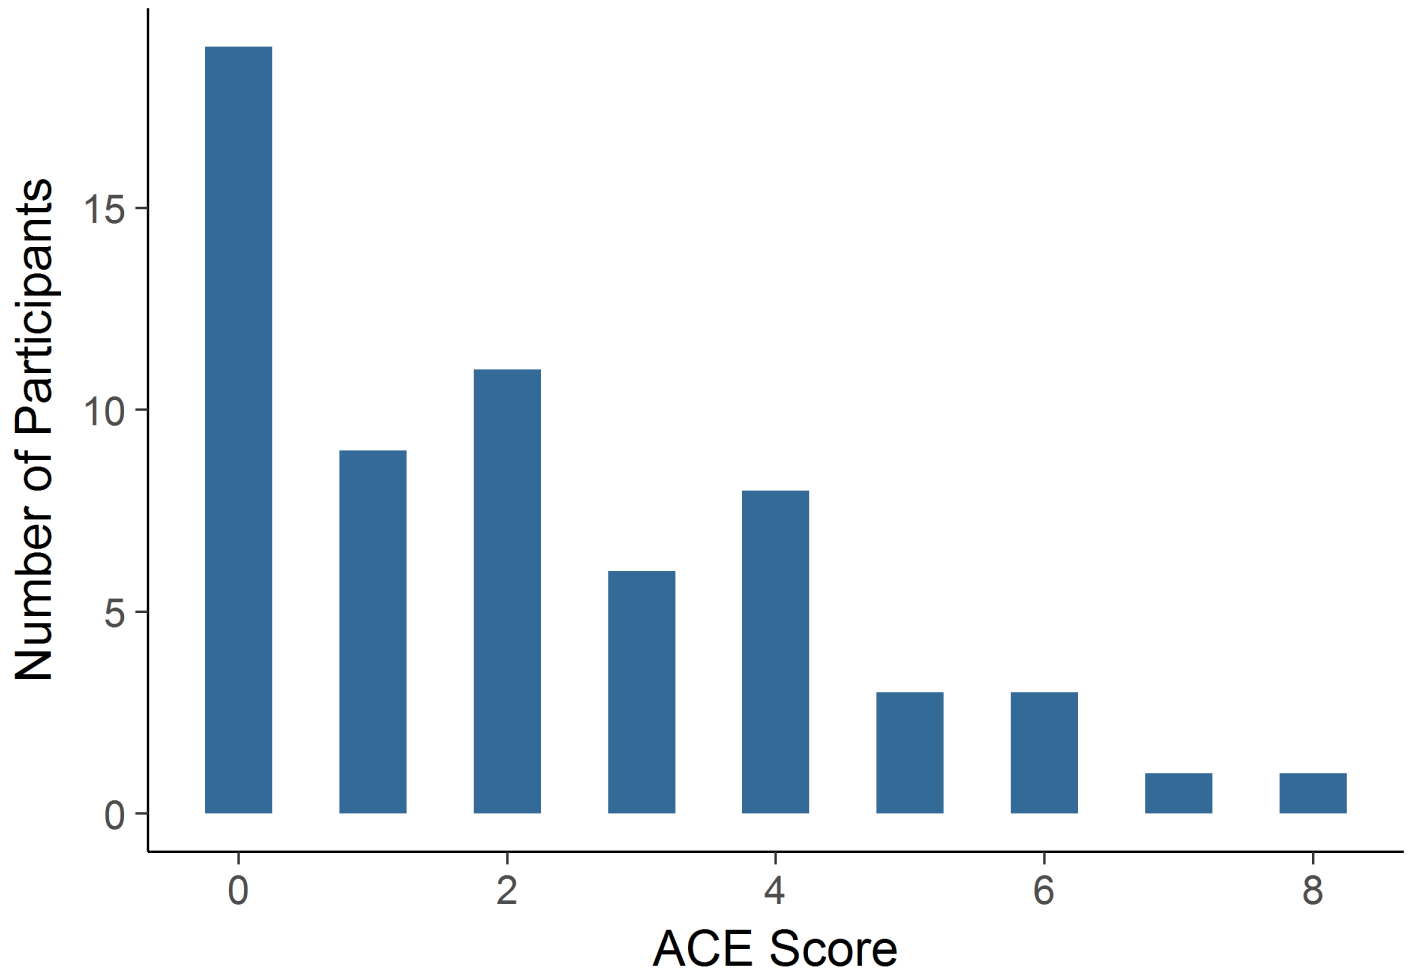

**Supplemental Figure 1 – Distribution histogram of ACE scores**

**Abbreviations:**

ACE: Adverse Childhood Events

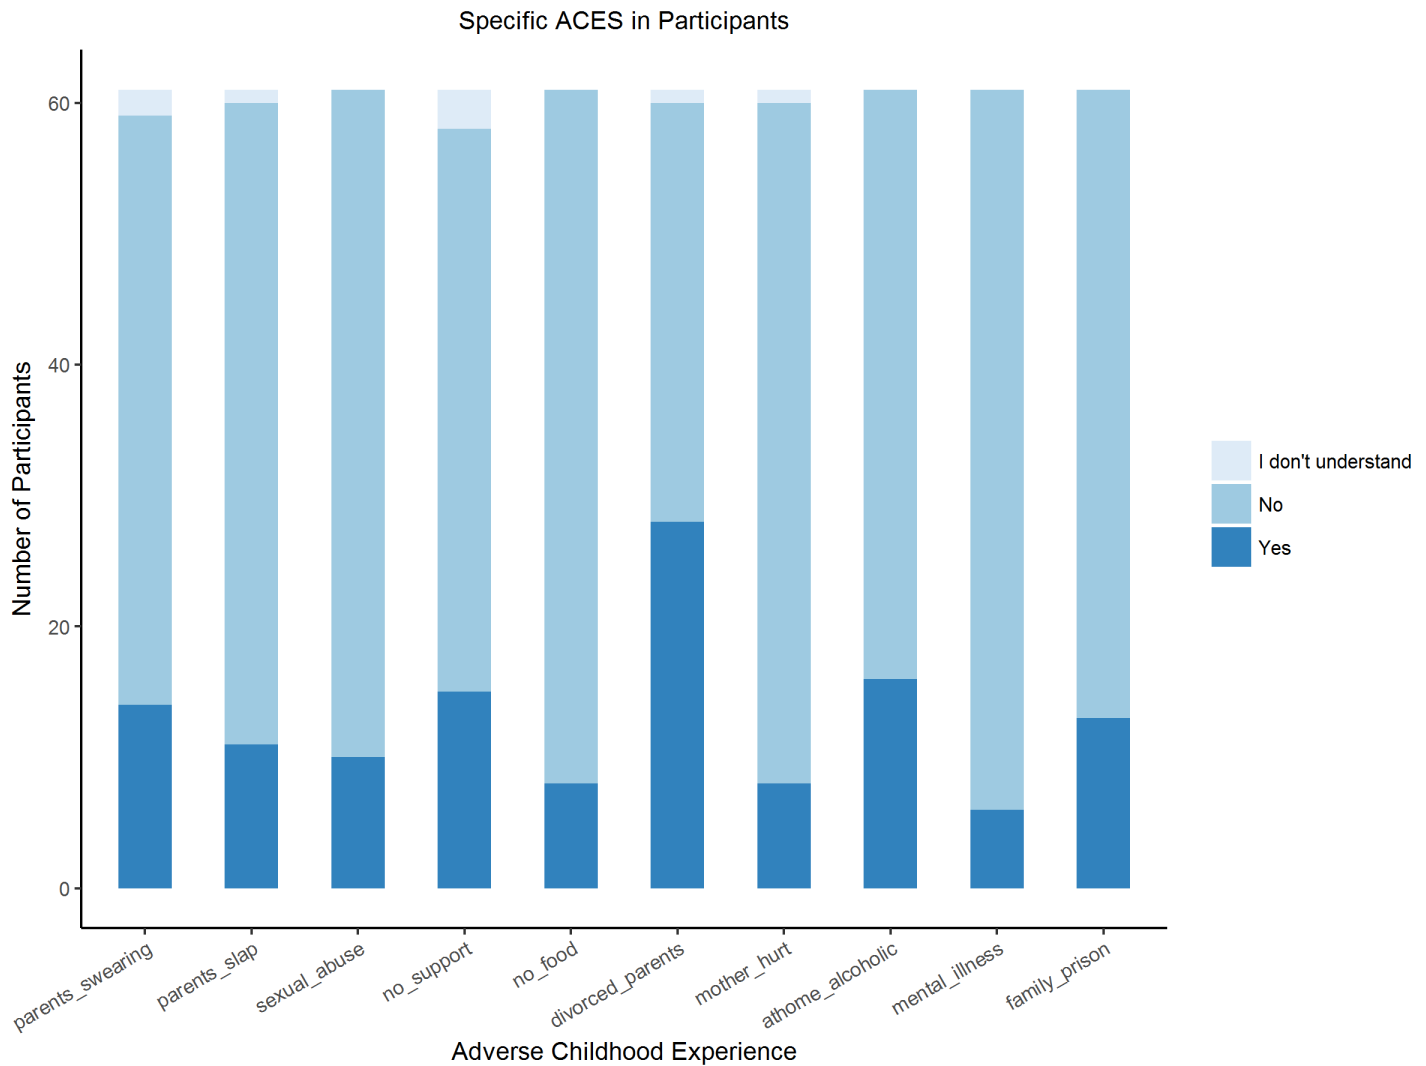

## Supplemental Figure 2 – Specific ACEs in Participants

### Abbreviations:

ACE: Adverse Childhood Events

Parents\_swearing: “Did a parent or other adult in the household often or very often... Swear at you, insult you, put you down, or humiliate you? or Act in a way that made you afraid that you might be physically hurt?”

Parents\_slap: “Did a parent or other adult in the household often or very often... Push, grab, slap, or throw something at you? or Ever hit you so hard that you had marks or were injured?”

Sexual\_abuse: “Did an adult or person at least 5 years older than you ever... Touch or fondle you or have you touch their body in a sexual way? Or Attempt or actually have oral, anal, or vaginal intercourse with you?”

No\_support: “Did you often or very often feel that ... No one in your family loved you or thought you were important or special? or Your family didn’t look out for each other, feel close to each other, or support each other?”

No\_food: “Did you often or very often feel that ... You didn’t have enough to eat, had to wear dirty clothes, and had no one to protect you? or Your parents were too drunk or high to take care of you or take you to the doctor if you needed it?”

Divorced\_parents: “Were your parents ever separated or divorced?”

Mother\_hurt: “Was your mother or stepmother: Often or very often pushed, grabbed, slapped, or had something thrown at her? or Sometimes, often, or very often kicked, bitten, hit with a fist, or hit with something hard? or Ever repeatedly hit at least a few minutes or threatened with a gun or knife?”

Athome\_alcoholic: “Did you live with anyone who was a problem drinker or alcoholic or who used street drugs?”

Mental\_illness: “Was a household member depressed or mentally ill, or did a household member attempt suicide?”

Family\_prison: “Did a household member go to prison?”

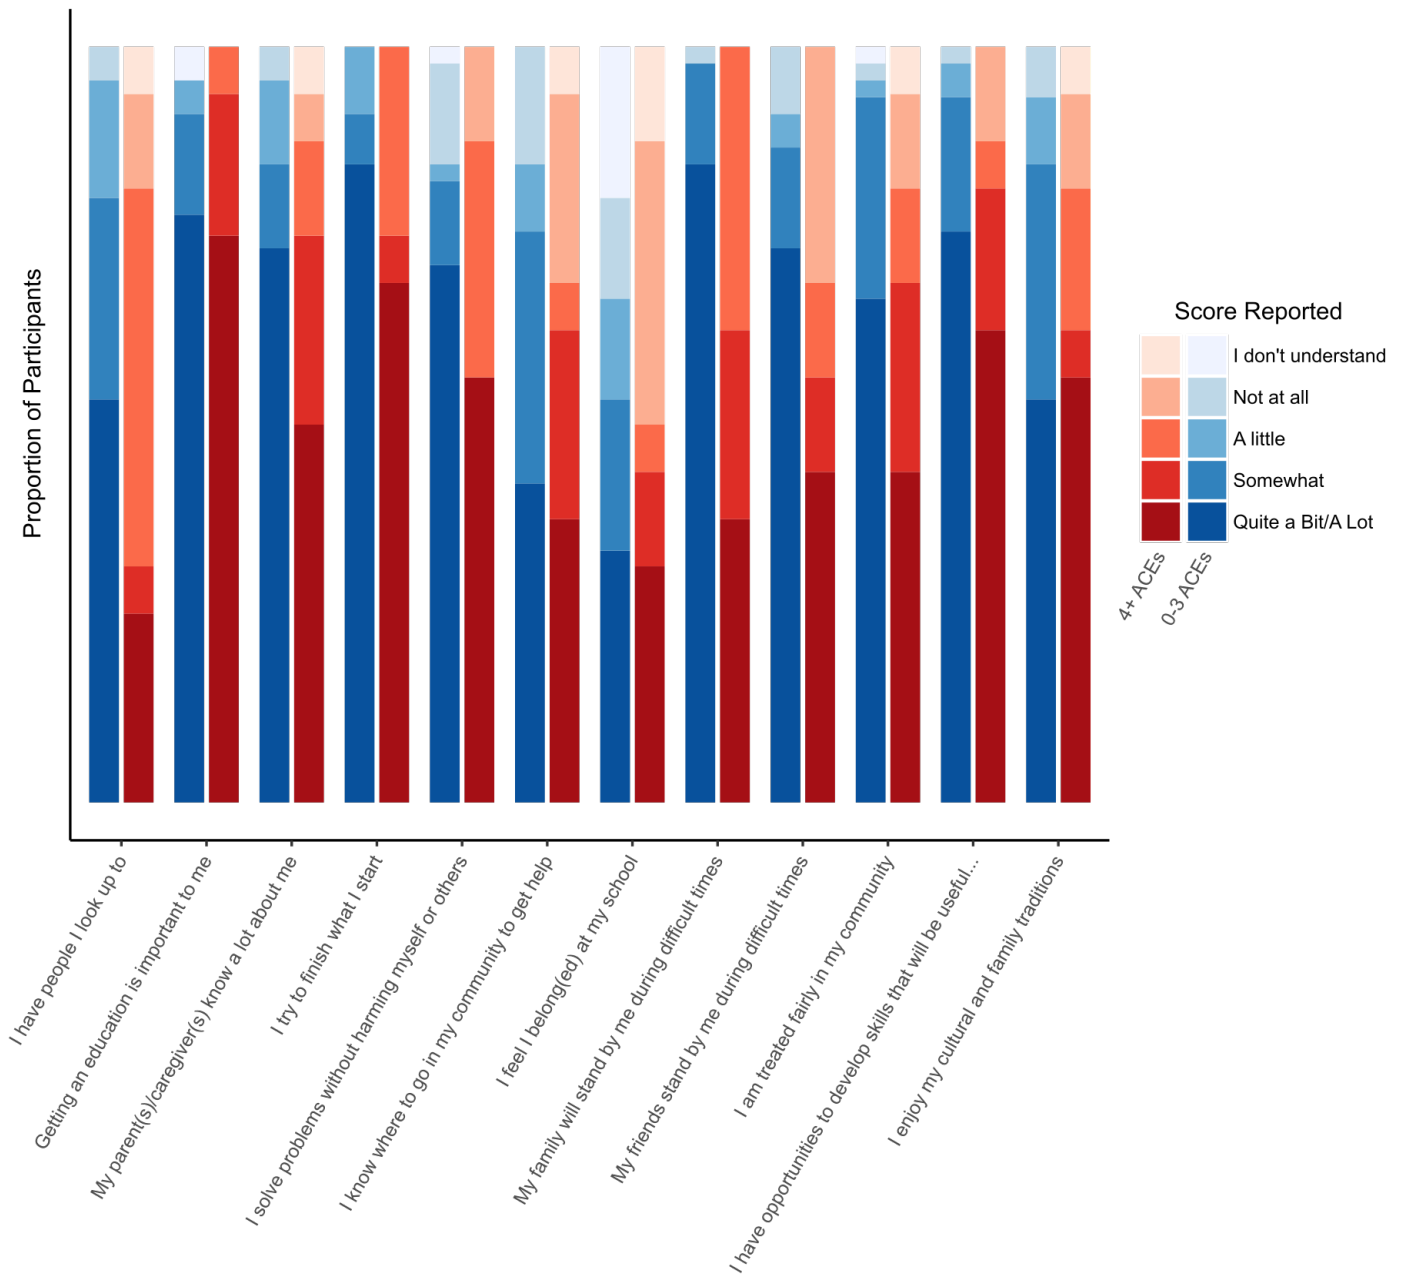

**Supplemental Figure 3 – Distribution of resilience scores by question**

**Supplemental Table 1 – Risk of secondary outcomes with Adverse Childhood Experiences (ACEs) and Resilience**

|            | ACE 4+                                                  |         | Resilience                                              |         | Interaction |
|------------|---------------------------------------------------------|---------|---------------------------------------------------------|---------|-------------|
|            | Adjusted OR<br>(95% CI) <sup>‡</sup>                    | p-value | Adjusted OR<br>(95% CI) <sup>‡</sup>                    | p-value | p-value     |
| Obesity    | 1.60x10 <sup>4</sup><br>(1.16-2.21x10 <sup>8</sup> )    | 0.0466  | 5.09<br>(0.584-44.3)                                    | 0.1409  | 0.0535      |
| Arrested   | 5.01x10 <sup>-3</sup><br>(2.07x10 <sup>-7</sup> -121)   | 0.3036  | 7.75x10 <sup>-2</sup><br>(6.37x10 <sup>-3</sup> -0.942) | 0.0448  | 0.2628      |
| Depression | 0.478<br>(1.56x10 <sup>-4</sup> -1.47x10 <sup>3</sup> ) | 0.8569  | 0.478<br>(1.56x10 <sup>-4</sup> -1.47x10 <sup>3</sup> ) | 0.8701  | 0.8839      |
| Expelled   | 2.06x10 <sup>4</sup><br>(0.56-7.62x10 <sup>8</sup> )    | 0.0641  | 2.57<br>(0.279-23.8)                                    | 0.4046  | 0.0672      |
| Trauma     | 0.936<br>(5.67x10 <sup>-5</sup> -1.55x10 <sup>4</sup> ) | 0.9894  | 0.681<br>(0.1-4.64)                                     | 0.6947  | 0.6635      |

<sup>‡</sup>Adjusted for influence of gender, age, race / ethnicity, language of survey and country of birth

Secondary health outcomes as measured by survey were evaluated against ACEs and resilience, as well as the interaction of the two variables, and control variables. ACE: adverse childhood experience; OR: odds ratio

**Supplemental Table 2 – Race of participants who identified as Hispanic**

|             | Number of patients |
|-------------|--------------------|
| Blank       | 5                  |
| Black       | 1                  |
| Don't Know  | 8                  |
| Other       | 23                 |
| White       | 13                 |
| White Other | 1                  |
